# Supplementary material for: SERS Liquid Biopsy Profiling of Serum for the Diagnosis of Kidney Cancer
Source: MDPI journal article supplement (doi:10.3390/biomedicines10020233), 2022-01-22
Supplement: s1 [file s1]

**Supplementary Table S1.** Demographic data and tumor related information of the renal cell carcinoma patients enrolled in the study.

| <b>Number</b> | <b>Age<br/>(years)</b> | <b>Sex</b> | <b>Tumor<br/>histology</b> | <b>Tumor<br/>grade</b> | <b>TNM<br/>stage</b> | <b>Stage</b> |
|---------------|------------------------|------------|----------------------------|------------------------|----------------------|--------------|
| <b>1</b>      | 51                     | F          | Clear cell carcinoma       | 3                      | T1bN0M0              | 1            |
| <b>2</b>      | 60                     | M          | Clear cell carcinoma       | 1                      | T1a N0M0             | 1            |
| <b>3</b>      | 41                     | M          | Clear cell carcinoma       | 1                      | T1a N0M0             | 1            |
| <b>4</b>      | 66                     | M          | Clear cell carcinoma       | 1                      | T1a N0M0             | 1            |
| <b>5</b>      | 59                     | F          | Clear cell carcinoma       | 1                      | T1b N0M0             | 1            |
| <b>6</b>      | 52                     | M          | Clear cell carcinoma       | 2                      | T1a N0M0             | 1            |
| <b>7</b>      | 41                     | M          | Clear cell carcinoma       | 1                      | T1a N0M0             | 1            |
| <b>8</b>      | 63                     | M          | Clear cell carcinoma       | 1                      | T1b N0M0             | 1            |
| <b>9</b>      | 58                     | F          | Clear cell carcinoma       | 1                      | T1a N0M0             | 1            |
| <b>10</b>     | 59                     | F          | Clear cell carcinoma       | 2                      | T1a N0M0             | 1            |
| <b>11</b>     | 50                     | M          | Clear cell carcinoma       | 3                      | T2b N0M0             | 2            |
| <b>12</b>     | 48                     | M          | Clear cell carcinoma       | 3                      | T2b N0M0             | 2            |
| <b>13</b>     | 59                     | M          | Clear cell carcinoma       | 2                      | T3aN0M0              | 3            |
| <b>14</b>     | 66                     | M          | Clear cell carcinoma       | 2                      | T3a N0M0             | 3            |
| <b>15</b>     | 59                     | F          | Clear cell carcinoma       | 2                      | T3a N0M0             | 3            |
| <b>16</b>     | 53                     | M          | Clear cell carcinoma       | 2                      | T3a N0M0             | 3            |
| <b>17</b>     | 49                     | F          | Clear cell carcinoma       | 1                      | T3a N0M0             | 3            |
| <b>18</b>     | 68                     | F          | Clear cell carcinoma       | 2                      | T3a N0M0             | 3            |
| <b>19</b>     | 64                     | F          | Clear cell carcinoma       | 1                      | T3a N0M0             | 3            |
| <b>20</b>     | 64                     | M          | Clear cell carcinoma       | 2                      | T3b N0M0             | 3            |
| <b>21</b>     | 71                     | M          | Clear cell carcinoma       | 3                      | T3b N0M0             | 3            |
| <b>22</b>     | 68                     | M          | Clear cell carcinoma       | 2                      | T3a N0M0             | 3            |

|    |    |   |                      |   |          |   |
|----|----|---|----------------------|---|----------|---|
| 23 | 46 | M | Clear cell carcinoma | 2 | T3a N0M0 | 3 |
|----|----|---|----------------------|---|----------|---|

**Supplementary Table S2.** Demographic data of control patients.

| Number | Age (years) | Sex |
|--------|-------------|-----|
| 1      | 79          | M   |
| 2      | 56          | M   |
| 3      | 59          | M   |
| 4      | 46          | M   |
| 5      | 57          | M   |
| 6      | 71          | M   |
| 7      | 80          | M   |
| 8      | 64          | F   |
| 9      | 70          | F   |
| 10     | 68          | M   |
| 11     | 71          | M   |
| 12     | 36          | F   |
| 13     | 46          | M   |
| 14     | 65          | M   |
| 15     | 41          | F   |
| 16     | 45          | M   |
| 17     | 75          | M   |
| 18     | 45          | M   |
| 19     | 76          | F   |
| 20     | 54          | M   |
| 21     | 37          | F   |
| 22     | 37          | M   |
| 23     | 60          | M   |
| 24     | 58          | M   |
| 25     | 59          | M   |
| 26     | 55          | F   |
| 27     | 58          | F   |

**Supplementary Table S3.** The performance metrics for the classification of Stage 1 renal cell carcinoma and control group patients based on surface-enhanced Raman scattering (SERS) spectra of serum using three classification algorithms (random forest, kNN and naïve Bayes). PCs 2, 6 and 9 were used as input for the machine learning algorithms. AUC - area under the curve; CA - classification accuracy; F1 - score representing the harmonic mean of precision and recall; Precision - positive predicted value; Recall - sensitivity.

| Statistical model | AUC  | CA   | F1   | Precision | Recall |
|-------------------|------|------|------|-----------|--------|
| Random forest     | 0.78 | 0.75 | 0.76 | 0.76      | 0.75   |
| kNN               | 0.73 | 0.73 | 0.70 | 0.70      | 0.73   |
| Naïve Bayes       | 0.67 | 0.73 | 0.70 | 0.70      | 0.73   |

**Supplementary Table S4.** The performance metrics for the classification of Stage 3 renal cell carcinoma and control group patients based on surface-enhanced Raman scattering (SERS) spectra of serum using three classification algorithms (random forest, kNN and naïve Bayes). PCs 2, 6, 9 and 12 were used as input for the machine learning algorithms. AUC - area under the curve; CA - classification accuracy; F1 - score representing the harmonic mean of precision and recall; Precision - positive predicted value; Recall - sensitivity.

| Statistical model | AUC  | CA   | F1   | Precision | Recall |
|-------------------|------|------|------|-----------|--------|
| Random forest     | 0.86 | 0.78 | 0.77 | 0.78      | 0.78   |
| kNN               | 0.72 | 0.68 | 0.69 | 0.70      | 0.68   |
| Naïve Bayes       | 0.88 | 0.84 | 0.84 | 0.85      | 0.84   |

**Supplementary Table S5.** The performance metrics for the classification of Stage 1 and 3 renal cell carcinoma and control group patients based on surface-enhanced Raman scattering (SERS) spectra of serum using three classification algorithms (random forest, kNN and naïve Bayes). PCs 1 and 9 were used as input for the machine learning algorithms. AUC - area under the curve; CA - classification accuracy; F1 - score representing the harmonic mean of precision and recall; Precision - positive predicted value; Recall - sensitivity.

| Statistical model | AUC  | CA   | F1   | Precision | Recall |
|-------------------|------|------|------|-----------|--------|
| Random forest     | 0.90 | 0.81 | 0.81 | 0.81      | 0.81   |
| kNN               | 0.66 | 0.71 | 0.71 | 0.72      | 0.71   |
| Naïve Bayes       | 0.86 | 0.71 | 0.71 | 0.72      | 0.71   |
