# Supplementary figures and images for: SERS Liquid Biopsy Profiling of Serum for the Diagnosis of Kidney Cancer
Source: MDPI journal article supplement (doi:10.3390/biomedicines10020233), 2022-01-22

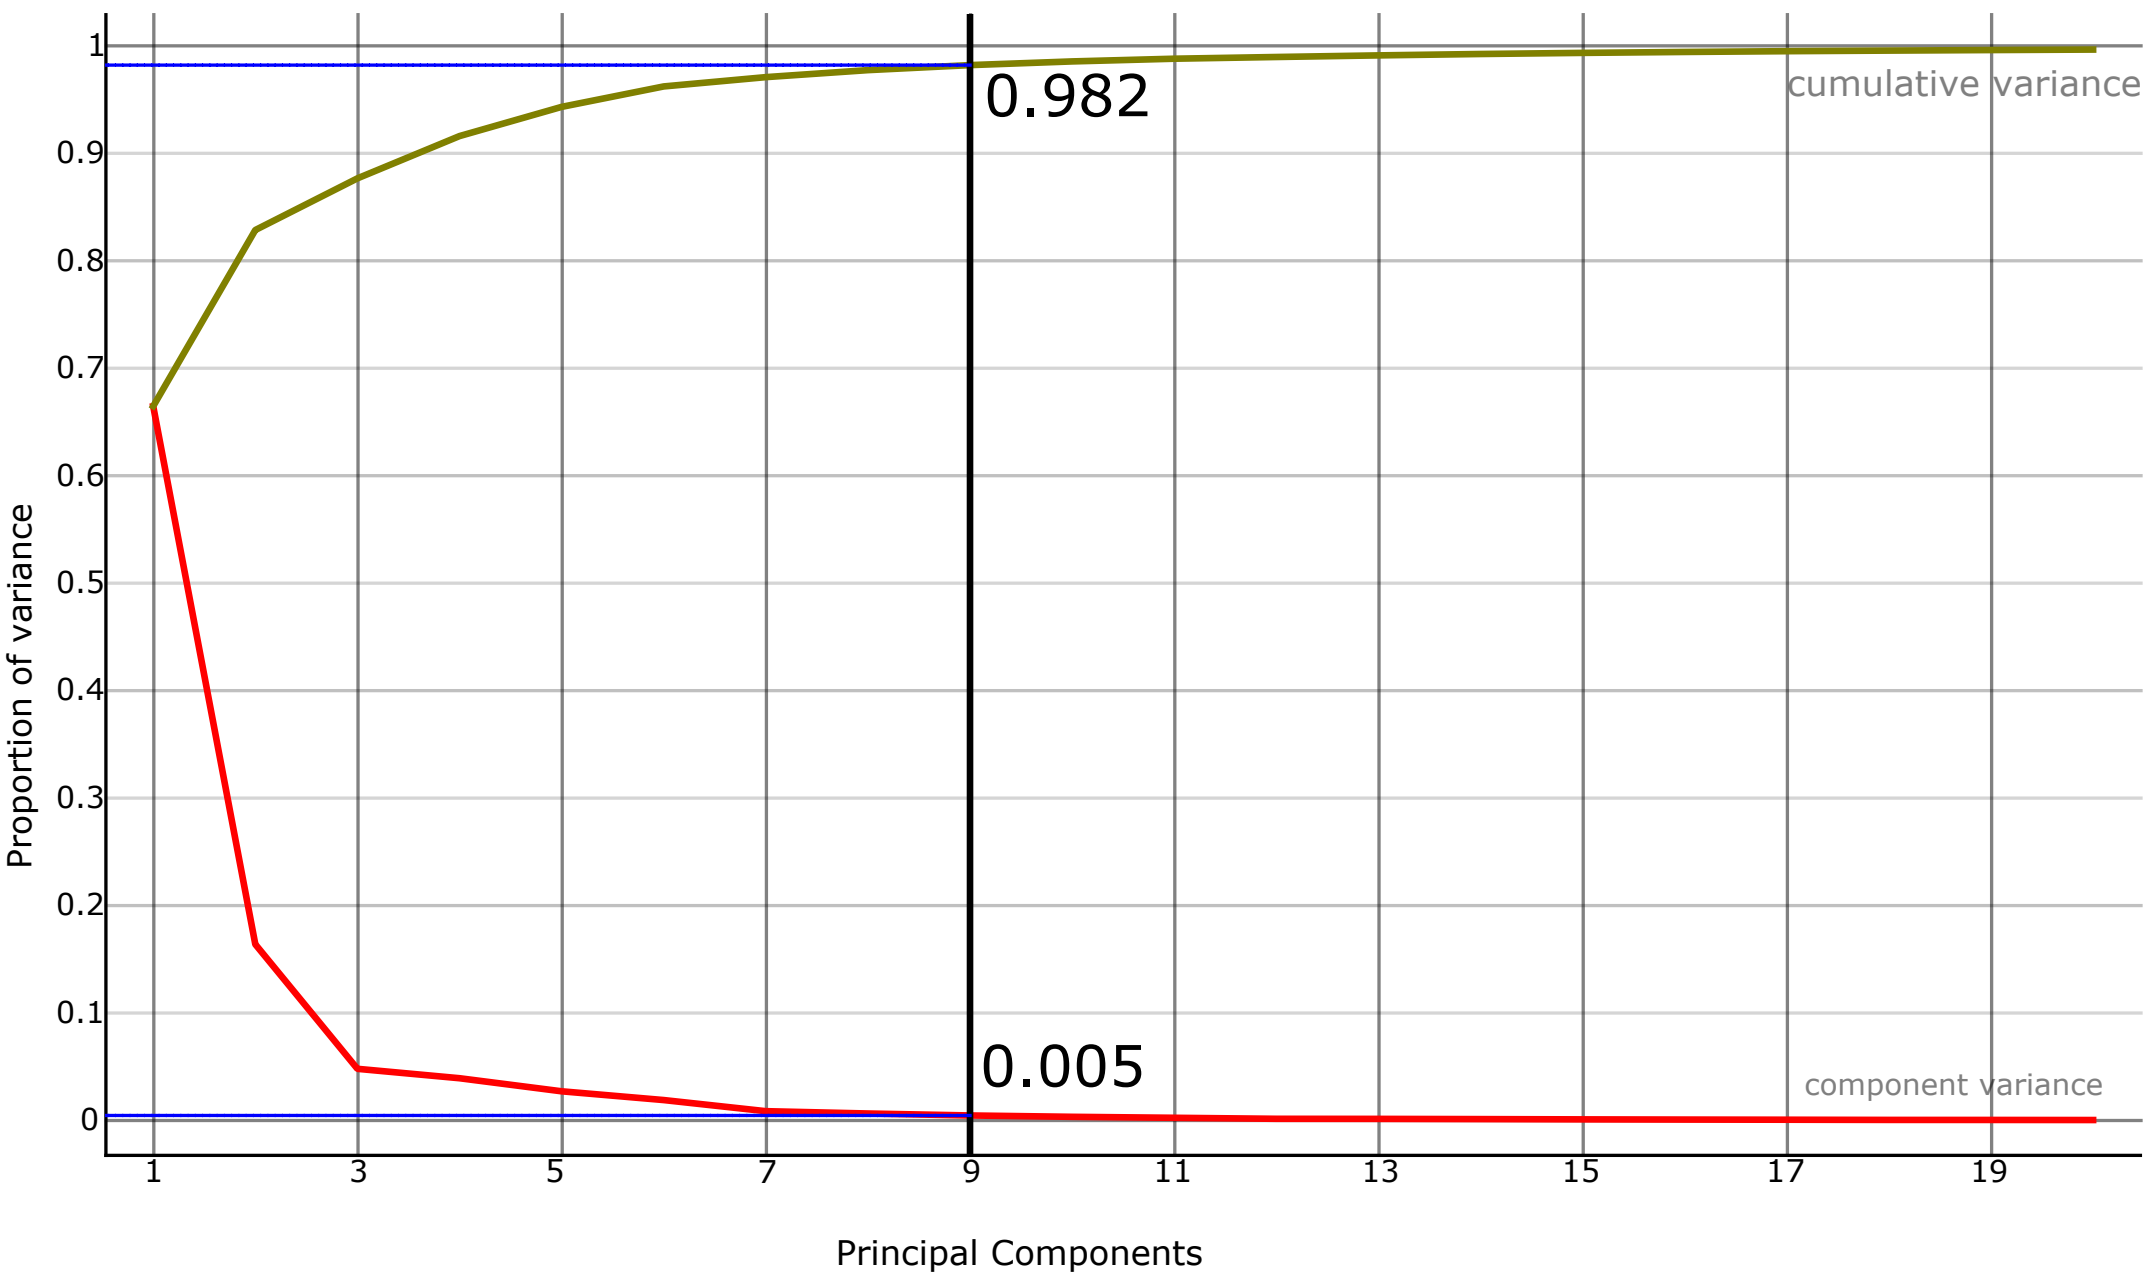

Supplement: s1 [file s1]
